# Supplementary material for: Perioperative Management of Kidney Transplantation in Patients with Myasthenia Gravis : a case report with literature review
Source: Research Square preprint supplement (doi:10.21203/rs.3.rs-6195911/v1), 2025-04-30
Supplement: Supplementary file 1 [file d1eff07ba7144814641a81ba.docx]

| **Table1. Literature review: KTx recipients complicated by MG.** | | | | | | | | | | |
| --- | --- | --- | --- | --- | --- | --- | --- | --- | --- | --- |
| Authors | published  year | Sex | KTx Age | donor  type | etiology  of  ESRD | maintenance  IS | treatment  for  MG | history  of  MC | cause  of  the MC onset | treatment  for  MC |
| S O'Reilly [10] | 1992 | F | 44 | deceased | PKD | CyA, PSL | AChE-Is,  anticholinergics | no |  |  |
| Hwang IH [4] | 2014 | F | 35 | deceased | lupus nephritis | TAC, MMF, PSL | AChE-Is | yes  (pod3) | exposure to several drugs,  or  mental and physical stresses for KTx | IVIg |
| Nieto-Ríos JF [11] | 2016 | F | 29 | deceased | unknown | CyA, AZ, PSL | a | yes | urinary tract infection, or ciprofloxacin use | plasmapheresis |
| our case | 2025 | F | 57 | living | IgAN | TAC, MMF, MP | AChE-Is,  TAC, MP  IA | yes  (twice) | infection and psychological stress | IVIg |
| KTx, Kidney transplantation; MG, myasthenia gravis; MC, myasthenic crisis; F, female; ESRD, end stage of renal disease; PKD, polycystic kidney disease; IgAN, IgA nephropathy; IS, immunosuppression; CyA, cyclosporine; PSL, prednisolone; TAC, tacrolimus; MMF, mycophenolate mofetil; MP, methylprednisolone; AZ, azathioprine; AChE-Is, acetylcholinesterase inhibitors; IA, immunoadsorption; pod, postoperative day; IVIg, intravenous immunoglobulin | | | | | | | | | | |
